# Supplementary material for: Acridine orange as a coreactant for efficient electrogenerated chemiluminescence of tris(2,2′-bipyridine)ruthenium(ii) and its use in selective and sensitive detection of thiourea
Source: Royal Society of Chemistry journal article supplement (doi:10.1039/d0cc01273d), 2020-01-01
Supplement: d0cc01273d1.pdf [file d0cc01273d1.pdf]

## Electronic Supplementary Information

### **Acridine orange as a coreactant for efficient electrogenerated chemiluminescence of tris(2,2'-bipyridine)ruthenium(II) and its use for selective and sensitive detection of thiourea**

Muhammad Saqib<sup>a</sup>, Shahida Bashir<sup>b</sup>, Shimeles Addisu Kitte<sup>a</sup>, Haijuan Li<sup>a</sup>, Yongdong Jin<sup>a,c\*</sup>

<sup>a</sup>*State Key Laboratory of Electroanalytical Chemistry, Changchun Institute of Applied Chemistry, Chinese Academy of Sciences, 5625 Renmin Street, Changchun, Jilin 130022, P. R. China*

<sup>b</sup>*Faculty of Science, Department of Mathematics, University of Gujrat, Gujrat 50700, Pakistan*

<sup>c</sup>*University of Science and Technology of China, Hefei 230026, P. R. China*

#### **Corresponding Author**

\* Tel: +86-431-85262661. Fax: +86-431-85262661.

E-mail: ydj@ciac.ac.cn.

## Table of Contents

|                                                                                                                                                                                                                                                                                                                                        |      |
|----------------------------------------------------------------------------------------------------------------------------------------------------------------------------------------------------------------------------------------------------------------------------------------------------------------------------------------|------|
| 1. Experimental section .....                                                                                                                                                                                                                                                                                                          | S-3  |
| 1.1 Chemicals and materials .....                                                                                                                                                                                                                                                                                                      | S-3  |
| 1.2 Apparatus .....                                                                                                                                                                                                                                                                                                                    | S-3  |
| 1.3 Procedure of ECL detection of ThU .....                                                                                                                                                                                                                                                                                            | S-3  |
| 2. Optimization of Detection Conditions .....                                                                                                                                                                                                                                                                                          | S-4  |
| <b>Fig. S1.</b> Comparison of anodic ECL–potential profiles for Ru(bpy) <sub>3</sub> <sup>2+</sup> -AO and Ru(bpy) <sub>3</sub> <sup>2+</sup> -TPrA.....                                                                                                                                                                               | S-5  |
| <b>Fig. S2.</b> The effect of radical scavengers on the ECL intensity of Ru(bpy) <sub>3</sub> <sup>2+</sup> -AO system. Concentrations: AA (0.50 mM); SS (0.50 mM); SOD (6.0 μg/mL)..                                                                                                                                                  | S-5  |
| <b>Fig. S3.</b> Selectivity performance of the developed ThU ECL sensing platform. (A) ECL-time profiles for various interferants, and (B) corresponding bar plot for selectivity of the as-developed ECL method. The concentration of all interfering compounds was 10-fold higher (1 mM) than the concentration of ThU (100 μM)..... | S-6  |
| <b>Fig. S4.</b> ECL–potential profiles for four different solutions: AO-ThU (black curve), Ru(bpy) <sub>3</sub> <sup>2+</sup> -ThU (red curve), Ru(bpy) <sub>3</sub> <sup>2+</sup> -AO (green curve), Ru(bpy) <sub>3</sub> <sup>2+</sup> -AO-ThU (blue curve).....                                                                     | S-6  |
| <b>Fig. S5.</b> (A) The effect of Ru(bpy) <sub>3</sub> <sup>2+</sup> concentration on the ECL intensity, and (B) corresponding linear relationship between ECL intensity and Ru(bpy) <sub>3</sub> <sup>2+</sup> concentration from 25-800 μM. ....                                                                                     | S-7  |
| <b>Fig. S6.</b> (A) The effect of AO concentration on the ECL intensity, and (B) corresponding linear relationship between ECL intensity and AO concentration from 5-350 μM. ....                                                                                                                                                      | S-7  |
| <b>Fig. S7.</b> Effect of applied potential on the ECL intensity of the Ru(bpy) <sub>3</sub> <sup>2+</sup> -AO system.....                                                                                                                                                                                                             | S-8  |
| <b>Table S1.</b> Comparison of reported different methods for the detection of ThU.....                                                                                                                                                                                                                                                | S-9  |
| <b>Table S2.</b> Detection recoveries of ThU in tap water, orange juice, and orange peel real samples .....                                                                                                                                                                                                                            | S-10 |
| <b>References</b> .....                                                                                                                                                                                                                                                                                                                | S-10 |

## 1. Experimental section

### 1.1 Chemicals and materials

Tripropylamine (TPrA), glucose (Glu), tris(2,2'-bipyridyl)dichlororuthenium(II) hexahydrate ( $\text{Ru}(\text{bpy})_3\text{Cl}_2 \cdot 6\text{H}_2\text{O}$ ), uric acid (UA), and ascorbic acid (AA) were bought from Sigma–Aldrich (USA). Superoxide dismutase (SOD), glutathione (GSH), acridine orange hemi(zinc chloride) salt (AO), and dopamine (DA) were obtained from Aladdin Reagent Co., Ltd. (Shanghai, China). Sodium sulfite (SS) and thiourea (ThU) were purchased from Alfa Aesar Chemical Reagent Co., Ltd. (China). L-glutamic acid (Glu), aspartic acid (Asp), hydroxylamine (HA), and L-arginine (Arg) were purchased from Shanghai Yuanju Biotechnology Co. Ltd. (Shanghai, China). L-cysteine (Cys), L-tryptophan (Tryp), sodium oxalate ( $\text{C}_2\text{O}_4^{2-}$ ), urea, and hydroxyurea (HU) were supplied by Sinopharm Chemical Reagent Co. Ltd. (Beijing, China). All the metal salts used in this work were purchased from Beijing Chemical Reagent Company (Beijing, China). The working phosphate buffer solution (pH 7.4, 0.1 M PBS) was prepared by thorough mixing of stock solutions of  $\text{NaH}_2\text{PO}_4$  and  $\text{Na}_2\text{HPO}_4$ . All the chemicals used in this work were of analytical grade reagents and purified water was obtained using a Millipore system (18.2 M $\Omega$ ·cm).

### 1.2 Apparatus

ECL measurements were performed on a multifunctional MPI-A ECL detection system (Xi'An Remex Electronic Science & Technology Co. Ltd., Xi'An, China) in a homemade transparent bottom three-electrode cell. The photomultiplier tube (PMT) of the ECL analyzer was adjusted to achieve optimal intensities. A conventional three-electrode system was applied for the electrochemical and ECL experiments. The working, reference and counter electrodes were glassy carbon electrode (GCE), Ag/AgCl (saturated KCl) and Pt wire electrode, respectively. Differential pulse voltammetry (DPV) was conducted with CHI660E electrochemical workstation (Chenhua, Shanghai). Prior each experiment, GCE was polished with alumina slurry (0.3 and 0.05  $\mu\text{m}$ ), cleaned with ultrapure water, and then dried. The anodic ECL was recorded by scanning the electrode potential in the range of 0.2 to 1.25 V with a scan rate of 100 mV/s in 0.1 M PBS solution (pH 7.4). The emission spectrum of the system was recorded in cyclic voltammetry (CV) mode by using a series of wavelength filters (400–700 nm) over PMT of ECL analyzer.

### 1.3 Procedure of ECL detection of ThU

The ECL detection of ThU on an MPI-A ECL analyzer was performed by immersing the GCE into 600  $\mu\text{l}$  of 0.1 M PBS solution (pH 7.4) with 350  $\mu\text{M}$  of AO and 800  $\mu\text{M}$  of  $\text{Ru}(\text{bpy})_3^{2+}$ , containing various amounts of ThU, respectively. The ECL intensities were recorded by setting the PMT voltage at 700V, potential scan from 0.2 to 1.25 V, and the scan rate at 100 mV/s.

## 2. Optimization of Detection Conditions

To achieve optimal applicability of the developed ECL system, a set of crucial experiments were performed. As basic environment (pH) might cause negative effects on biomolecules detection, a physiological pH of 7.4 was opted to enhance the applicability of the methods, and the ECL emission at pH 7.4 totally satisfied the detection requirements as well.

It is well known that the ECL emission is highly depended on the concentration of emitter ( $\text{Ru}(\text{bpy})_3^{2+}$ ) and coreactant (AO). Therefore, the effect of both  $\text{Ru}(\text{bpy})_3^{2+}$  and AO concentrations was tested from 25-1666  $\mu\text{M}$  and 5-1600  $\mu\text{M}$ , respectively. As shown in **Fig. S5 & S6**, the ECL signals increase sharply with extension of the concentration up to 800  $\mu\text{M}$  and 350  $\mu\text{M}$ , respectively, and reached a plateau afterwards. Therefore, 0.8 mM of  $\text{Ru}(\text{bpy})_3^{2+}$  and 0.35 mM of AO were selected as the optimal concentrations for subsequent experiments.

Moreover, the scan rate effect on the ECL intensity and electrooxidation rate of system was further investigated from 5 to 500 mV/s. As shown in **Fig. 3**, the ECL intensity and anodic currents increased linearly with the square root of scan rates ( $v^{1/2}$ ), suggesting that the ECL reaction is diffusion controlled. A scan rate of 0.1 V/s was chosen in the subsequent experiments. In addition, the effect of applied potential on ECL intensity was also optimized from 0.9-1.5 V. The maximum ECL intensity was achieved at a potential of +1.3 V (**Fig. S7**).

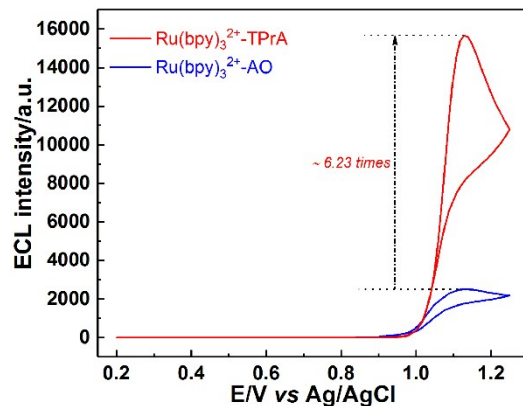

**Fig. S1.** Comparison of anodic ECL–potential profiles for Ru(bpy)<sub>3</sub><sup>2+</sup>-AO and Ru(bpy)<sub>3</sub><sup>2+</sup>-TPrA. Concentrations: Ru(bpy)<sub>3</sub><sup>2+</sup>: 0.8 mM; AO and TPrA: 0.35 mM; pH: 7.4 (0.1 M PBS); PMT: 700 V

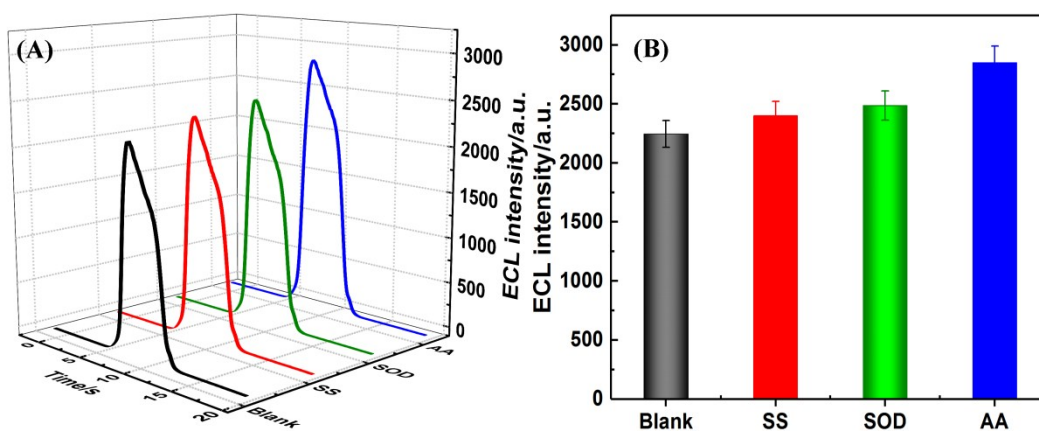

**Fig. S2.** The effect of radical scavengers on the ECL intensity of Ru(bpy)<sub>3</sub><sup>2+</sup>-AO system. Concentrations: AA (0.50 mM); SS (0.50 mM); SOD (6.0 µg/mL). The experiment was tested at pH 7.4 (0.1 M PBS) in the presence of 0.35 mM AO and 0.8 mM Ru(bpy)<sub>3</sub><sup>2+</sup> solution; PMT: 700 V.

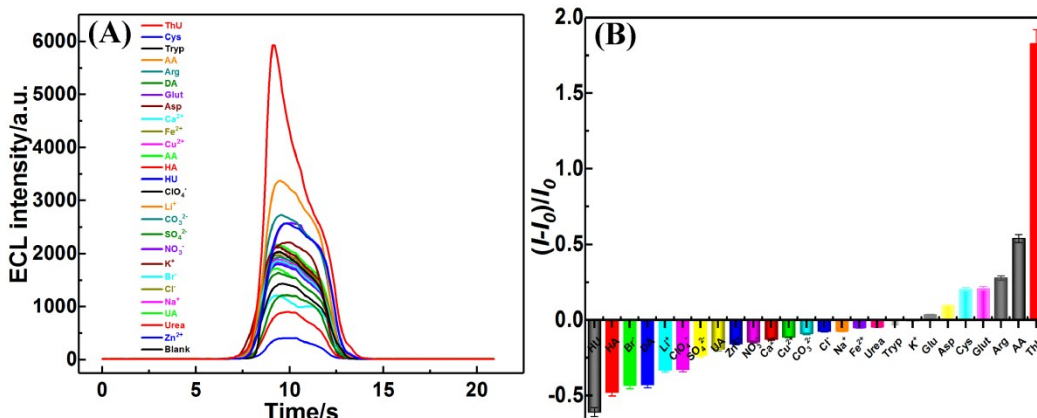

**Fig. S3.** Selectivity performance of the developed ThU ECL sensing platform. (A) ECL-time profiles for various interferants, and (B) corresponding bar plot for selectivity of the as-developed ECL method. The concentration of all interfering compounds was 10-fold higher (1 mM) than the concentration of ThU (100  $\mu$ M). The selectivity test was performed at pH 7.4 (0.1 M PBS) in the presence of 0.35 mM AO and 0.8 mM  $\text{Ru}(\text{bpy})_3^{2+}$  solution; PMT: 700 V.

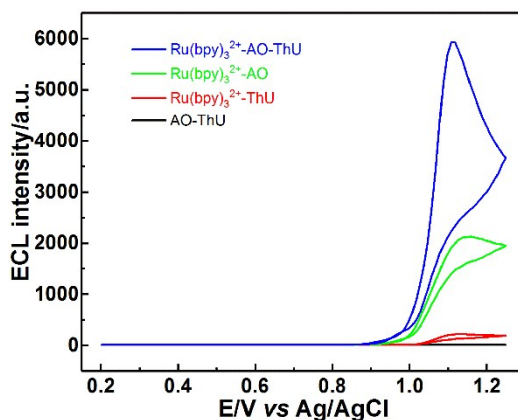

**Fig. S4.** ECL-potential profiles for the four tested different solutions: AO-ThU (black curve),  $\text{Ru}(\text{bpy})_3^{2+}$ -ThU (red curve),  $\text{Ru}(\text{bpy})_3^{2+}$ -AO (green curve),  $\text{Ru}(\text{bpy})_3^{2+}$ -AO-ThU (blue curve). Concentration of  $\text{Ru}(\text{bpy})_3^{2+}$  and AO was 0.8 mM and 0.35 mM, respectively; Concentration of ThU: 100  $\mu$ M; pH: 7.4 (0.1 M PBS); PMT: 700 V.

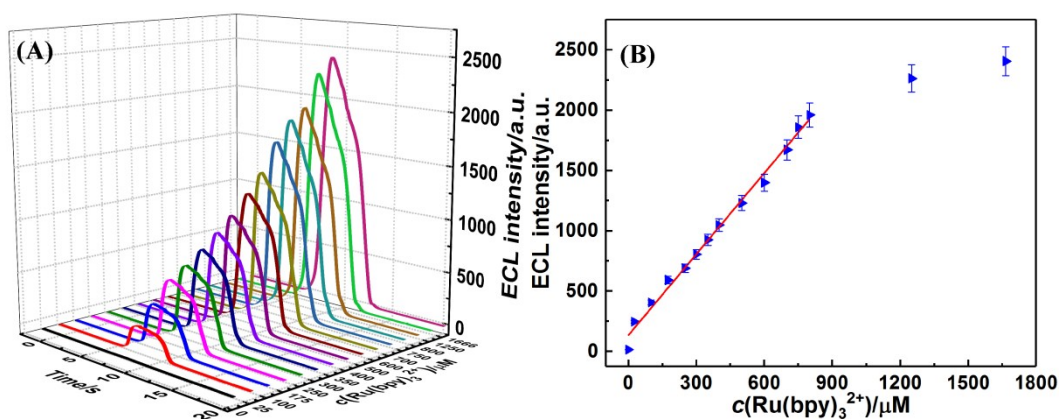

**Fig. S5.** (A) The effect of Ru(bpy)<sub>3</sub><sup>2+</sup> concentration on the ECL intensity, and (B) corresponding linear relationship between ECL intensity and Ru(bpy)<sub>3</sub><sup>2+</sup> concentration from 25-800 μM. The experiment was tested at pH 7.4 (0.1 M PBS) in the presence of 0.35 mM AO; PMT: 700 V.

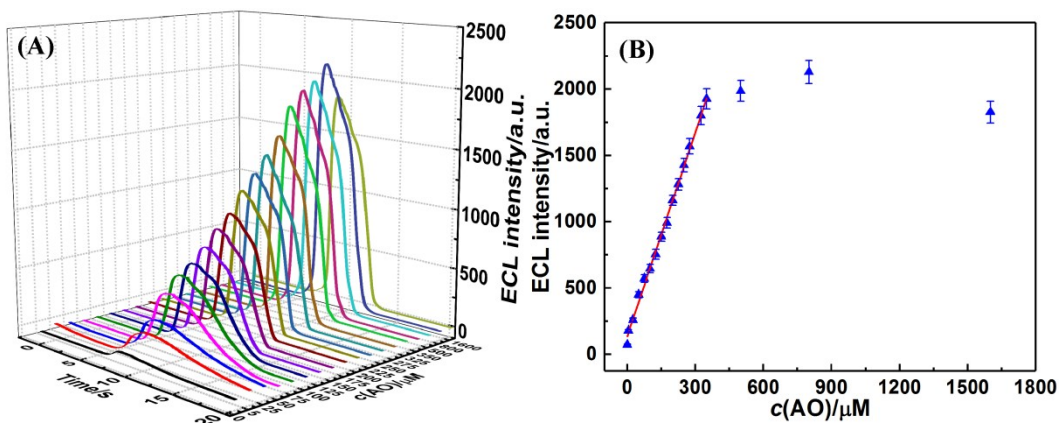

**Fig. S6.** (A) The effect of AO concentration on the ECL intensity, and (B) corresponding linear relationship between ECL intensity and AO concentration from 5-350 μM. The experiment was tested at pH 7.4 (0.1 M PBS) in the presence of 0.8 mM Ru(bpy)<sub>3</sub><sup>2+</sup>; PMT: 700 V.

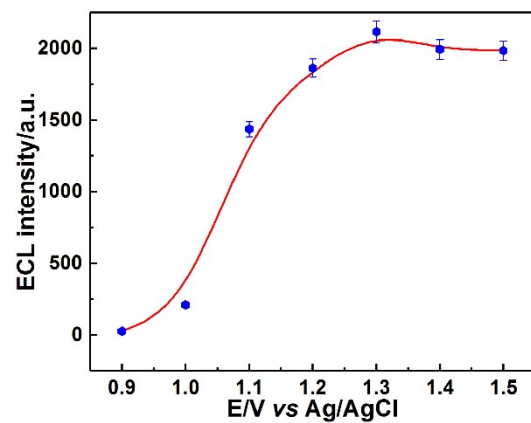

**Fig. S7.** Effect of applied potential on the ECL intensity of the  $\text{Ru}(\text{bpy})_3^{2+}$ -AO system. The experiment was conducted at pH 7.4 (0.1 M PBS) in the presence of 0.35 mM AO and 0.8 mM  $\text{Ru}(\text{bpy})_3^{2+}$  solution; PMT: 700 V.



**Table S1.** Comparison of reported different methods for the detection of ThU

| Analytical Method                                   | Probe/Materials                                                                                | Linear range                                        | LOD                   | Ref.         |
|-----------------------------------------------------|------------------------------------------------------------------------------------------------|-----------------------------------------------------|-----------------------|--------------|
| Colorimetry                                         | fluorescein and AuNPs                                                                          | 0.05–3.0 $\mu\text{M}$                              | 0.023 $\mu\text{M}$   | 1            |
| TRES (chemosensor)                                  | iridium(III) complex                                                                           | 10–200 $\mu\text{M}$                                | 3.85 $\mu\text{M}$    | 2            |
| FL                                                  | nitrogen doped carbon dots (NCDs)                                                              | 0.90–10.0 $\mu\text{M}$                             | 0.15 $\mu\text{M}$    | 3            |
| FL                                                  | nitrogen-doped graphene quantum dots                                                           | 0.5–14 $\mu\text{M}$                                | 0.0417 $\mu\text{M}$  | 4            |
| EIS                                                 | nanostructured silver (Nano-Ag) film with carbon paper (CP) substrate (Nano-Ag/CP)             | 26.3–3284.3 $\mu\text{M}$                           | 26.3 $\mu\text{M}$    | 5            |
| CV                                                  | manganese oxide nanospheres /deoxyribonucleic (DNA)                                            | 50–3000 $\mu\text{M}$                               | 14 & 22 $\mu\text{M}$ | 6            |
| CV                                                  | graphene nanosheets–Ag nanoparticles                                                           | 1–3000 $\mu\text{M}$                                | 0.7 $\mu\text{M}$     | 7            |
| Amperometry                                         | tin doped manganese dioxide/CNT                                                                | 10–100 $\mu\text{M}$                                | 0.68 $\mu\text{M}$    | 8            |
| UV–Vis Spectroscopy                                 | nanocomposites (Sn MnO <sub>2</sub> /CNT) chromogenic probe <i>N</i> -chloroacetyl parafuchsin | 5.0–0.2 mM                                          | 2.1 $\mu\text{M}$     | 9            |
| UV–Vis Spectroscopy                                 | quinones                                                                                       | 97–768 $\mu\text{M}$                                | 11 $\mu\text{M}$      | 10           |
| FTIR Spectroscopy                                   | iodine and sodium hydrogen carbonate solutions                                                 | 77–1016 $\mu\text{M}$                               | 13 $\mu\text{M}$      | 11           |
| Kinetic spectrophotometry (catalytic effect)        | Janus green (JG) with potassium iodate                                                         | 0.1–154 $\mu\text{M}$                               | 0.1 $\mu\text{M}$     | 12           |
| kinetic spectrophotometry (induction period effect) | meta cresol purple (MCP) with bromate                                                          | 1.31–78.8 $\mu\text{M}$                             | 0.26 $\mu\text{M}$    | 13           |
| Inhibitor biosensor                                 | dissolved oxygen probe                                                                         | 1–20 $\mu\text{M}$                                  | 1.0 $\mu\text{M}$     | 14           |
| CL                                                  | nitrogen-doped carbon quantum dots (NCD)                                                       | 0.1–10.0 $\mu\text{M}$                              | 0.038 $\mu\text{M}$   | 15           |
| HPLC                                                | -----                                                                                          | -----                                               | 0.026 $\mu\text{M}$   | 16           |
| Mass spectrometry                                   | -----                                                                                          | 0.13–65.68 $\mu\text{M}$                            | 0.013 $\mu\text{M}$   | 17           |
| Raman spectroscopy                                  | -----                                                                                          | $3.8 \times 10^4$ – $2.6 \times 10^5$ $\mu\text{M}$ | -----                 | 18           |
| ECL                                                 | -----                                                                                          | 0.1–500 $\mu\text{M}$                               | 10 nM                 | Present Work |

**TRES:** Time-resolved emission spectroscopy; **FL:** fluorescence; **EIS:** Electrochemical impedance spectroscopy; **CV:** cyclic voltammetry; **UV-Vis:** ultraviolet visible; **FTIR:** Fourier transform infrared resonance; **CL:** chemiluminescence; **HPLC:** high performance liquid chromatography; **ECL:** electrochemiluminescence

**Table S2.** Detection recoveries of ThU in tap water, orange juice, and orange peel real samples

| Samples      |           | Concentrations of ThU ( $\mu\text{M}$ ) |              |                           | Recovery (%) | RSD (n=3;%) |
|--------------|-----------|-----------------------------------------|--------------|---------------------------|--------------|-------------|
|              |           | Amount Detected <sup>a</sup>            | Amount Added | Amount Found <sup>b</sup> |              |             |
| ThU          | Tap Water | N.D                                     | 0.0          | ---                       | ---          | ---         |
|              |           |                                         | 1.0          | 0.983                     | 98.30        | 1.88        |
|              |           |                                         | 5.0          | 5.11                      | 102.2        | 2.13        |
|              |           |                                         | 10.0         | 10.15                     | 101.5        | 2.20        |
| Orange Juice | N.D       | N.D                                     | 0.0          | ---                       | ---          | ---         |
|              |           |                                         | 1.0          | 0.991                     | 99.10        | 2.06        |
|              |           |                                         | 5.0          | 5.18                      | 103.6        | 2.19        |
|              |           |                                         | 10.0         | 10.42                     | 104.2        | 2.35        |
| Orange Peel  | 0.103     | 0.103                                   | 0.0          | ---                       | ---          | 2.42        |
|              |           |                                         | 1.0          | 1.094                     | 99.18        | 2.51        |
|              |           |                                         | 5.0          | 5.107                     | 100.1        | 2.36        |
|              |           |                                         | 10.0         | 10.31                     | 102.0        | 2.65        |

<sup>ab</sup>The average of three replicate determinations. N.D = Not Detected.

## References

1. C. Chen, D. Zhao, J. Sun and X. Yang, *Analyst*, 2016, **141**, 2581-2587.
2. W. Wang, Z.-Z. Dong, C. Yang, G. Li, Y.-C. Tse, C.-H. Leung and D.-L. Ma, *Sens. Actuators B*, 2017, **251**, 374-379.
3. C. Zhang, S. Wu, Y. Yu and F. Chen, *Spectrochim. Acta Part A*, 2020, **227**, 117666.
4. X. Fan and Z. Fan, *Anal. Lett.*, 2019, **52**, 2028-2040.
5. S. A. Mozaffari, H. S. Amoli, S. Simorgh and R. Rahmanian, *Electrochim. Acta*, 2015, **184**, 475-482.
6. A. Maleki, H. Daraei and N. Amini, *J. Colloid Interface Sci.*, 2017, **504**, 579-585.
7. A. Safavi, R. Ahmadi, F. A. Mahyari and M. Tohidi, *Sens. Actuators B*, 2015, **207**, 668-672.
8. P. Saharan, A. K. Sharma, V. Kumar and I. Kaushal, *Mater. Chem. Phys.*, 2019, **221**, 239-249.
9. X.-F. Yang and H. Wang, *Spectrochim. Acta Part A*, 2006, **65**, 1063-1068.
10. A. N. de Oliveira, H. de Santana, C. T. B. V. Zaia and D. A. M. Zaia, *J. Food Compos. Anal.*, 2004, **17**, 165-177.
11. K. Kargosha, M. Khanmohammadi and M. Ghadiri, *Analyst*, 2001, **126**, 1432-1435.
12. S. Abbasi, H. Khani, L. Hosseinzadeh and Z. Safari, *J. Hazard. Mater.*, 2010, **174**, 257-262.
13. M. Arab Chamjangali, G. Bagherian, N. Goudarzi and S. Mehrjoo-Irani, *J. Anal. Sci. Technol.*, 2015, **6**, 10.
14. M. K. Sezgintürk and E. Dinçkaya, *Food Bioprocess Technol.*, 2008, **3**, 128.
15. Y. Liu and S. Han, *Food Anal. Methods*, 2017, **10**, 3398-3406.
16. J. Rethmeier, G. Neumann, C. Stumpf, A. Rabenstein and C. Vogt, *J. Chromatogr. A*, 2001, **934**, 129-134.
17. A. Raffaelli, S. Pucci, R. Lazzaroni and P. Salvadori, *Rapid Commun. Mass Spectrom.*, 1997, **11**, 259-264.
18. H. J. Bowley, E. A. Crathorne and D. L. Gerrard, *Analyst*, 1986, **111**, 539-542.
